# Supplementary material for: SUPECA kinetics for scaling redox reactions in networks of mixed substrates and consumers and an example application to aerobic soil respiration
Source: Copernicus journal article supplement (doi:10.5194/gmd-10-3277-2017), 2017-09-05
Supplement: Supplementary file 1 [file gmd-10-3277-2017-supplement.pdf]

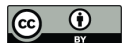

## *Supplement of*

# **SUPECA kinetics for scaling redox reactions in networks of mixed substrates and consumers and an example application to aerobic soil respiration**

**Jin-Yun Tang and William J. Riley**

*Correspondence to:* Jin-Yun Tang ([jinyuntang@lbl.gov](mailto:jinyuntang@lbl.gov))

The copyright of individual parts of the supplement might differ from the CC BY 3.0 License.

Below we provide auxiliary information for the numerical benchmark of the SUPECA kinetics.

The equations for fixed-point iteration are

$$[S_1]_{new} = [S_1]_T \left( 1 + \frac{[M]_{old}}{K_{MS1}} + \frac{k_{BS1}[B]_{old}}{k_{BS2}[S_2]_{old}} + \frac{k_{BS2}[B]_{old}}{k_2^+} \frac{[S_2]_{old}}{[S_1]_{old}} + \frac{k_{BS1}[B]_{old}}{k_2^+} \right)^{-1} \quad (S-1)$$

$$[S_2]_{new} = [S_2]_T \left( 1 + \frac{k_{BS2}[B]_{old}}{k_{BS1}[S_1]_{old}} + \frac{k_{BS2}[B]_{old}}{k_2^+} + \frac{k_{BS1}[B]_{old}}{k_2^+} \frac{[S_1]_{old}}{[S_2]_{old}} \right)^{-1} \quad (S-2)$$

$$[B]_{new} = [B]_T \left( 1 + \frac{k_{BS1}[S_1]_{old}}{k_{BS2}[S_2]_{old}} + \frac{k_{BS2}[S_2]_{old}}{k_{BS1}[S_1]_{old}} + \frac{k_{BS2}[S_2]_{old}}{k_2^+} + \frac{k_{BS1}[S_1]_{old}}{k_2^+} \right)^{-1} \quad (S-3)$$

$$[M]_{new} = [M]_T \left( 1 + \frac{[S_1]_{old}}{K_{MS1}} \right)^{-1} \quad (S-4)$$

The iteration starts with initial condition  $[S_1]_{old} = [S_1]_T$ ,  $[S_2]_{old} = [S_2]_T$ ,  $[B]_{old} = [B]_T$ , and  $[M]_{old} = [M]_T$ . The iteration stops when the relative change between two consecutive iterations is smaller than  $10^{-4}$ .

### Supplementary figure

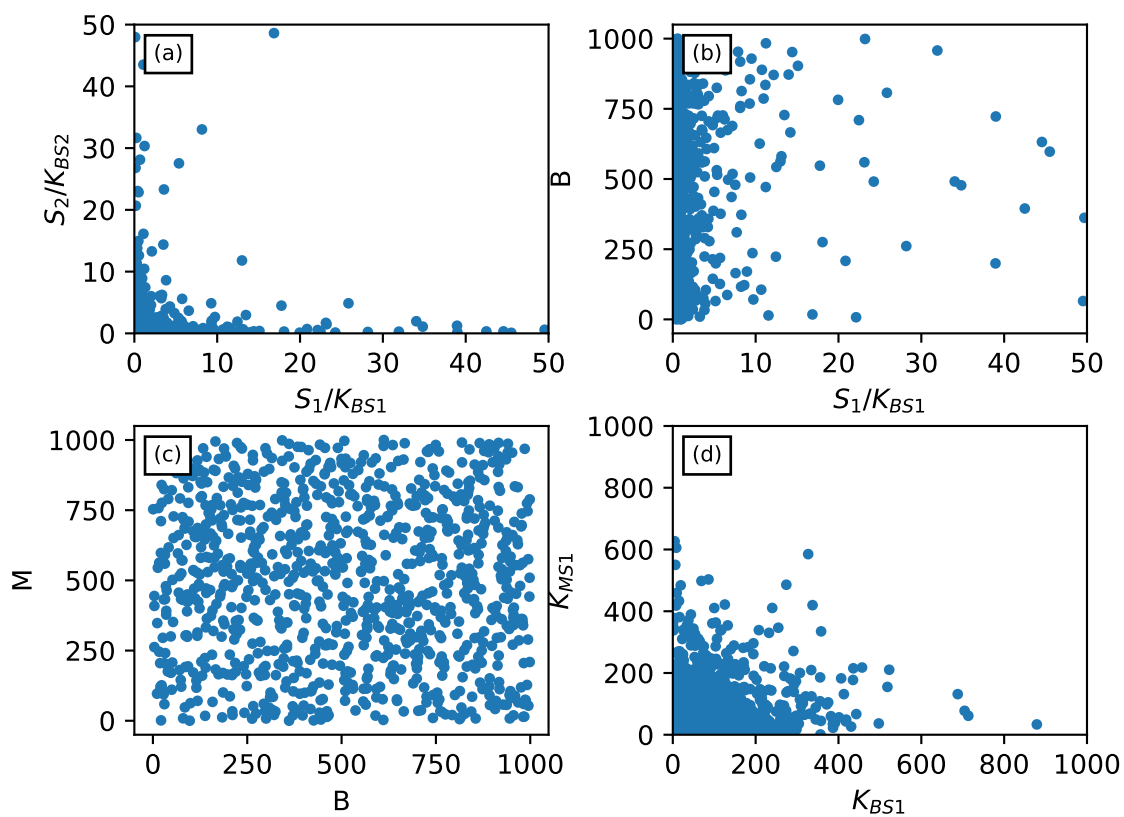

**Figure S1.** Scatter plots of the parameters used in the numerical benchmark of the SUPECA kinetics (which is Figure 3 in the main text).

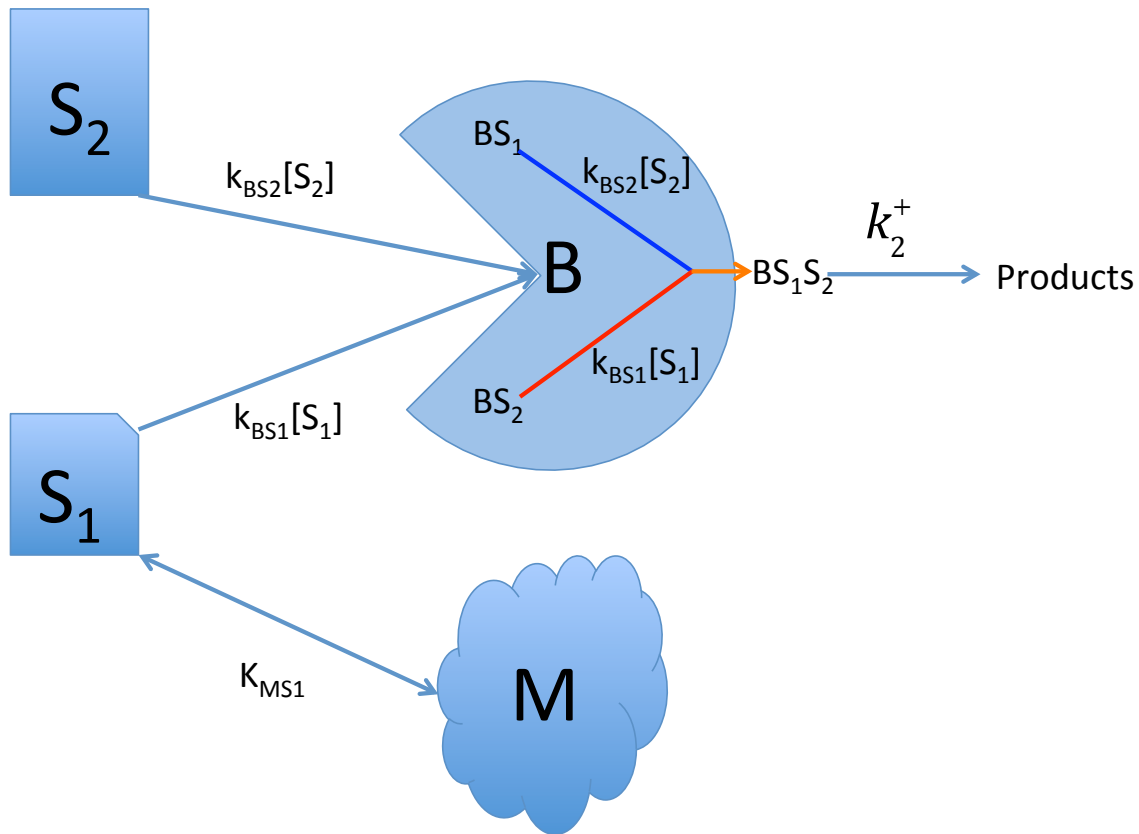

**Figure S2.** Graphic representation of the reaction network that is used for evaluating the numerical accuracy of SU and SUPECA. The AB-E reaction is of the form

$S_1 + S_2 \xrightarrow{B} BS_1S_2 \xrightarrow{k_2^+} B + \text{Products}$ , and  $S_1$  also interacts with sorbent  $M$  through the

reaction  $S_1 + M \xrightleftharpoons{K_{MS1}} MS_1$ . The equilibrium chemistry formulation of the problem is in Appendix F of the main text.
